# Supplementary material for: Saffron Floral By-Products as Novel Sustainable Vegan Ingredients for the Functional and Nutritional Improvement of Traditional Wheat and Spelt Breads
Source: Foods. 2023 Jun 15;12(12):2380. doi: 10.3390/foods12122380 (PMC10297254; doi:10.3390/foods12122380)
Supplement: Supplementary file 1 [file foods-12-02380-s001.zip › foods-2455456-supplementary.pdf]

**Table S1.** Lexicon for the sensory description of bread formulations.

|            | Attributes                                          | Definition                                                                                   | References and intensities                                                                                                                                                      |
|------------|-----------------------------------------------------|----------------------------------------------------------------------------------------------|---------------------------------------------------------------------------------------------------------------------------------------------------------------------------------|
| Appearance | Evenness colour of crust                            | Distribution of colour                                                                       | No uniform = 0.0; Uniform = 10.0                                                                                                                                                |
|            | Uniformity of shape                                 | Homogeneity of the bread                                                                     | No uniform = 0.0; Uniform = 10.0                                                                                                                                                |
| Flavour    | Flower <i>Crocus sativus</i> L.-ID (Odor and aroma) | Floral and herbaceous odor associated with <i>Crocus sativus</i> L. flowers                  | 5 g of grinded dried flowers of <i>Crocus sativus</i> L. + 100 mL H <sub>2</sub> O = 4; 20 g of grinded dried flowers of <i>Crocus sativus</i> L. + 25 mL H <sub>2</sub> O = 10 |
|            | Floral-Herbaceous                                   | Fresh, green, slightly sour aromatics associated with green vegetables                       | Kroger lima beans (canned) = 3.0; Small sprig fresh parsley = 7.0 (aroma); Fresh parsley = 10.0                                                                                 |
|            | Sweet                                               | The fundamental taste factor associated with a sucrose solution                              | Sucrose solution 4% = 2.5; Sucrose solution 8% = 5.0; Sucrose solution 16% = 9.5                                                                                                |
|            | Salty                                               | Fundamental taste sensation of which sodium chloride is typical                              | 0.2% NaCl solution = 2.5; 0.35% NaCl solution = 5.0; 0.8% NaCl solution = 9.0                                                                                                   |
|            | Sour                                                | The taste stimulated by acids, such as citric and malic acids                                | Tartaric acid solution 0.05% = 2.5; Tartaric acid solution 0.08% = 4.0; Tartaric acid solution 0.20% = 9.5                                                                      |
|            | Bitter                                              | The taste stimulated by substances such as quinine or caffeine                               | Caffeine solution 0.05% = 2.5; Caffeine solution 0.08% = 4.0                                                                                                                    |
|            | Astringent                                          | Dry sensation on the surface of the tongue or mouth associated with alum solution            | Alum solution 0.03% = 1.5; Alum solution 0.05% = 2.5; Alum solution 0.1% = 5.0                                                                                                  |
|            | Aftertaste                                          | Time in which the specific flavour of bread remains in the mouth after swallowing the sample | 10 s = 2.0; 30 s = 8.0                                                                                                                                                          |
| Texture    | Crust crispness                                     | The noise and force with which the sample breaks or fractured                                | Chewing gum (Wrigley) = 0.0; Graham cracker (Honey maid) = 5.0; Corn flakes (Kellogg's) = 10.0                                                                                  |
|            | Crust hardness                                      | Force required to bite through                                                               | Cream cheese (Philadelphia) = 1.0; Olives (Goya Foods) = 6.0; Fresh carrot = 10.0                                                                                               |
|            | Crust cohesiveness                                  | Amount of sample that deforms rather than ruptures                                           | Corn muffin (Jiffy) = 1.0; Pretzel = 6.0; Chewing gum (Wrigley) = 10.0                                                                                                          |
|            | Crumb hardness                                      | Force required to bite through                                                               | Cream cheese (Philadelphia) = 1.0; Olives (Goya Foods) = 6.0; Fresh carrot = 10.0                                                                                               |
|            | Crumb cohesiveness                                  | Amount of sample that deforms rather than ruptures                                           | Corn muffin (Jiffy) = 1.0; Pretzel = 6.0; Chewing gum (Wrigley) = 10.0                                                                                                          |
|            | Adhesiveness to palate                              | Force required to remove sample from palate                                                  | Fresh cherry tomato = 0.0; Pretzel rod (Bachman) = 7.0; Rice Krispies (Kellogg's) = 10.0                                                                                        |
|            | Stickiness to teeth                                 | Amount of product that adheres to oral surface                                               | Fresh cherry tomato = 0.0; Pretzel rod (Bachman) = 7.0; Rice Krispies (Kellogg's) = 10.0                                                                                        |
